# Supplementary material for: Screening and Research on Skin Barrier Damage Protective Efficacy of Different Mannosylerythritol Lipids
Source: MDPI journal article supplement (doi:10.3390/molecules27144648), 2022-07-21

## *Supplementary Materials*

### **Screening and Research on Skin Barrier Damage Protective Efficacy of Different Mannosylerythritol Lipids.**

Chenxu Jing <sup>1, 2, †</sup>, Jiling Guo <sup>2, †</sup>, Zhenzhuo Li <sup>1, †</sup>, Xiaohao Xu <sup>1, 2</sup>, Jing Wang <sup>1</sup>, Lu Zhai <sup>1</sup>, Jianzeng Liu <sup>2</sup>, Guang Sun <sup>1</sup>, Fei Wang <sup>1</sup>, Yangfen Xu <sup>3</sup>, Zhaolian Li <sup>3</sup>, Daqing Zhao <sup>2</sup>, Rui Jiang <sup>1, \*</sup> and Liwei Sun <sup>1, \*</sup>

<sup>1</sup> *Research Center of Traditional Chinese Medicine, The Affiliated Hospital to Changchun University of Chinese Medicine, Changchun, Jilin Province, China;*

<sup>2</sup> *Jilin Ginseng Academy, Changchun University of Chinese Medicine, Changchun, Jilin Province, China;*

<sup>3</sup> *Modern Hanfang Technology Company Limited, Guangzhou, Guangdong Province, China*

\*Correspondence: jiangrui800710@163.com (R.J.); sunnylilwei@163.com (L.S.)

<sup>†</sup> These authors contributed equally to this work.

## Table of Contents

**Figure S1:** HRESIMS of **MEL-A**.

**Figure S2:**  $^1\text{H}$  NMR spectrum of **MEL-A** in  $\text{CDCl}_3$  (500 MHz).

**Figure S3:**  $^{13}\text{C}$  NMR and DEPT spectrum of **MEL-A** in  $\text{CDCl}_3$  (126 MHz).

**Figure S4:** HRESIMS of **MEL-B**.

**Figure S5:**  $^1\text{H}$  NMR spectrum of **MEL-B** in  $\text{CDCl}_3$  (500 MHz).

**Figure S6:**  $^{13}\text{C}$  NMR and DEPT spectrum of **MEL-B** in  $\text{CDCl}_3$  (126 MHz).

**Figure S7:** HRESIMS of **MEL-C**.

**Figure S8:**  $^1\text{H}$  NMR spectrum of **MEL-C** in  $\text{CDCl}_3$  (600 MHz).

**Figure S9:**  $^{13}\text{C}$  NMR and DEPT spectrum of **MEL-C** in  $\text{CDCl}_3$  (151 MHz).

**Figure S1: HRESIMS of MEL-A**

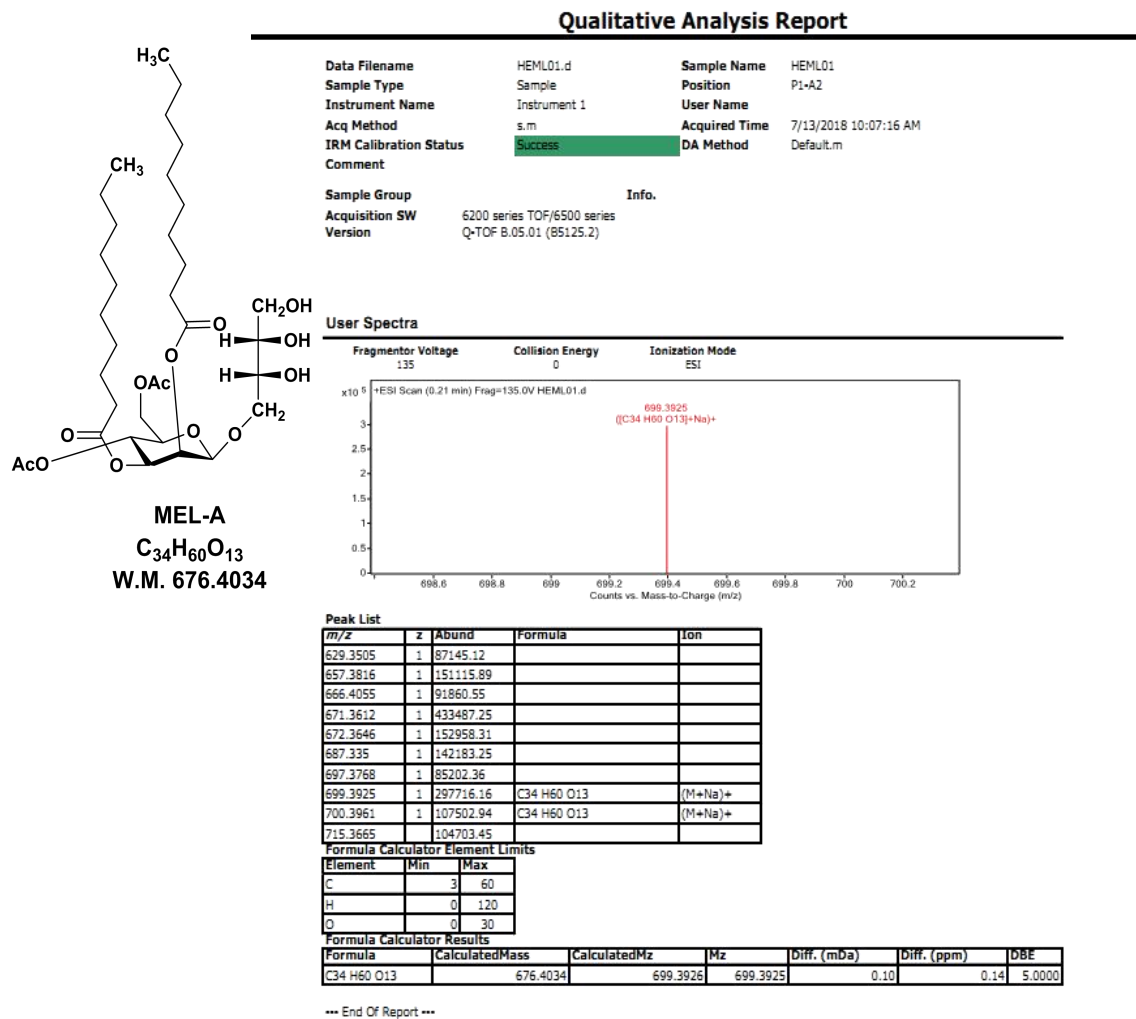

**Figure S2:**  $^1\text{H}$  NMR spectrum of **MEL-A** in  $\text{CDCl}_3$  (500 MHz).

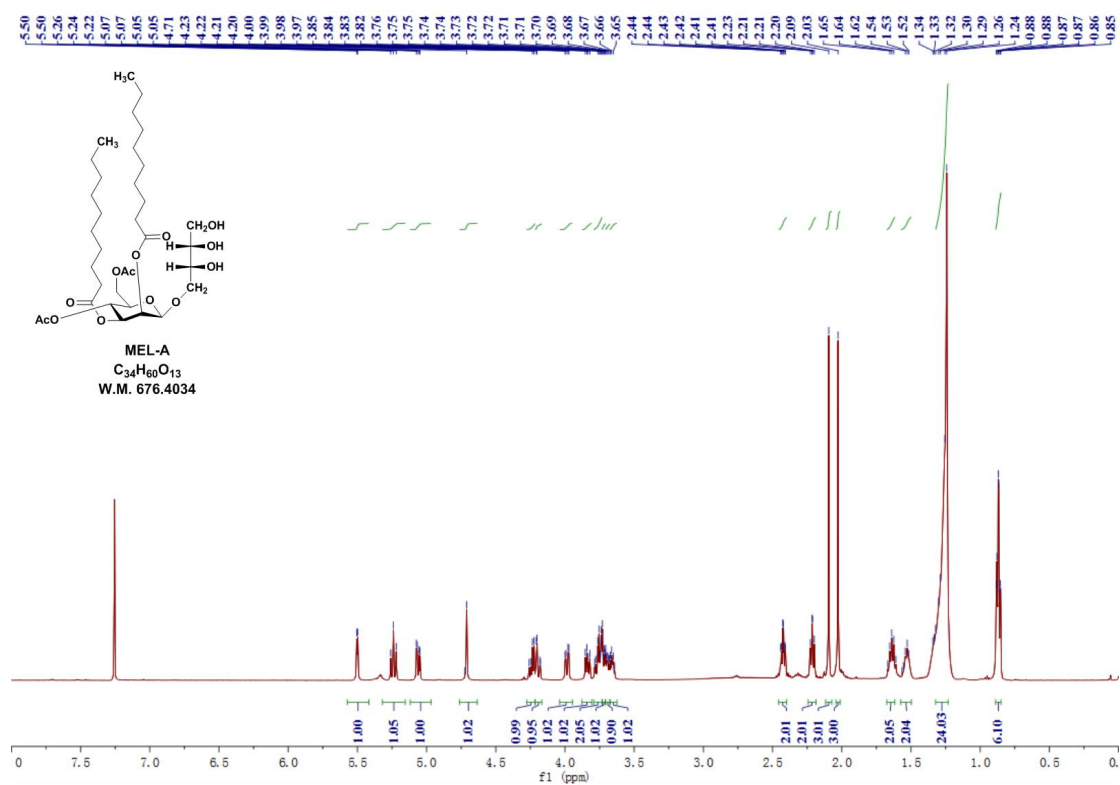

**Figure S3:**  $^{13}\text{C}$  and DEPT NMR spectrum of **MEL-A** in  $\text{CDCl}_3$  (126 MHz).

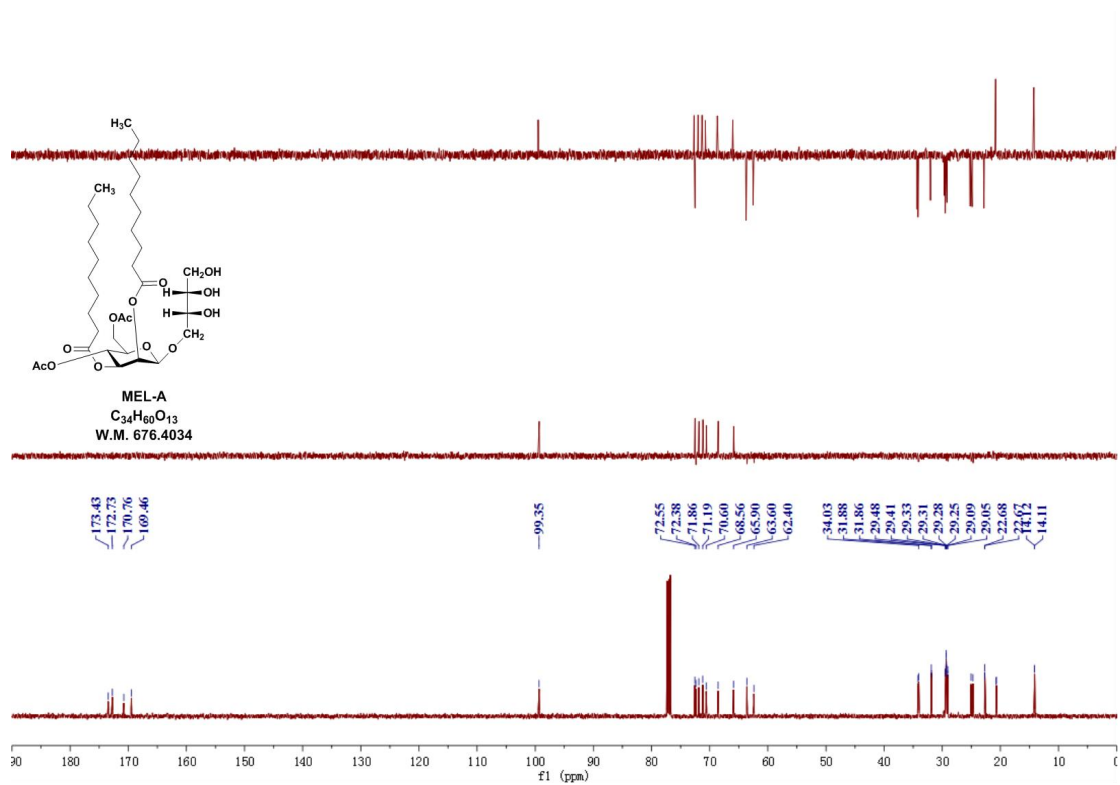

**Figure S4: HRESIMS of MEL-B**

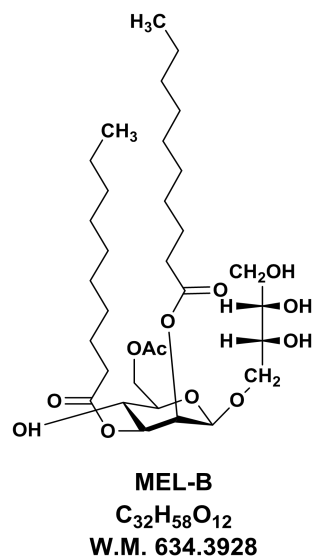

## Qualitative Analysis Report

|                        |                             |               |                       |
|------------------------|-----------------------------|---------------|-----------------------|
| Data Filename          | HEML03.d                    | Sample Name   | HEML03                |
| Sample Type            | Sample                      | Position      | P1-A3                 |
| Instrument Name        | Instrument 1                | User Name     |                       |
| Acq Method             | s.m                         | Acquired Time | 7/13/2018 10:08:27 AM |
| IRM Calibration Status | Success                     | DA Method     | Default.m             |
| Comment                |                             |               |                       |
| Sample Group           | Info.                       |               |                       |
| Acquisition SW         | 6200 series TOF/6500 series |               |                       |
| Version                | Q-TOF B.05.01 (B5125.2)     |               |                       |

## User Spectra

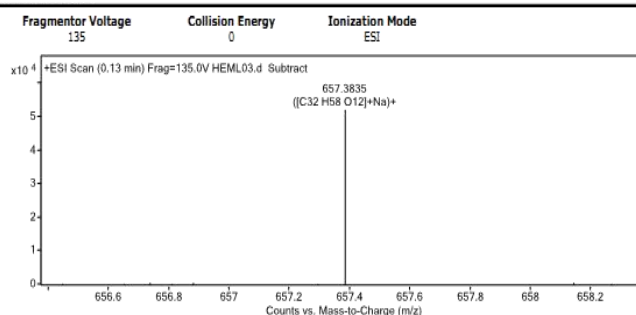

## Peak List

| m/z      | z | Abund    | Formula              | Ion        |
|----------|---|----------|----------------------|------------|
| 102.129  | 1 | 81070.5  |                      |            |
| 274.2751 | 1 | 27670.45 |                      |            |
| 318.3018 | 1 | 27710.97 |                      |            |
| 629.3521 | 1 | 28813.09 |                      |            |
| 657.3835 | 1 | 52066.29 | $C_{32}H_{58}O_{12}$ | $(M+Na)^+$ |
| 671.3623 | 1 | 50138.6  |                      |            |
| 673.3585 | 1 | 26043.09 |                      |            |
| 687.337  | 1 | 24854.12 |                      |            |
| 699.3941 | 1 | 34777.34 |                      |            |
| 715.3686 | 1 | 21239.64 |                      |            |

## Formula Calculator Element Limits

| Element | Min | Max |
|---------|-----|-----|
| C       | 3   | 60  |
| H       | 0   | 120 |
| O       | 0   | 30  |

## Formula Calculator Results

| Formula              | CalculatedMass | CalculatedMz | Mz       | Diff. (mDa) | Diff. (ppm) | DBE    |
|----------------------|----------------|--------------|----------|-------------|-------------|--------|
| $C_{32}H_{58}O_{12}$ | 634.3928       | 657.3820     | 657.3835 | -1.50       | -2.28       | 4.0000 |

--- End Of Report ---

**Figure S5:**  $^1\text{H}$  NMR spectrum of **MEL-B** in  $\text{CDCl}_3$  (500 MHz).

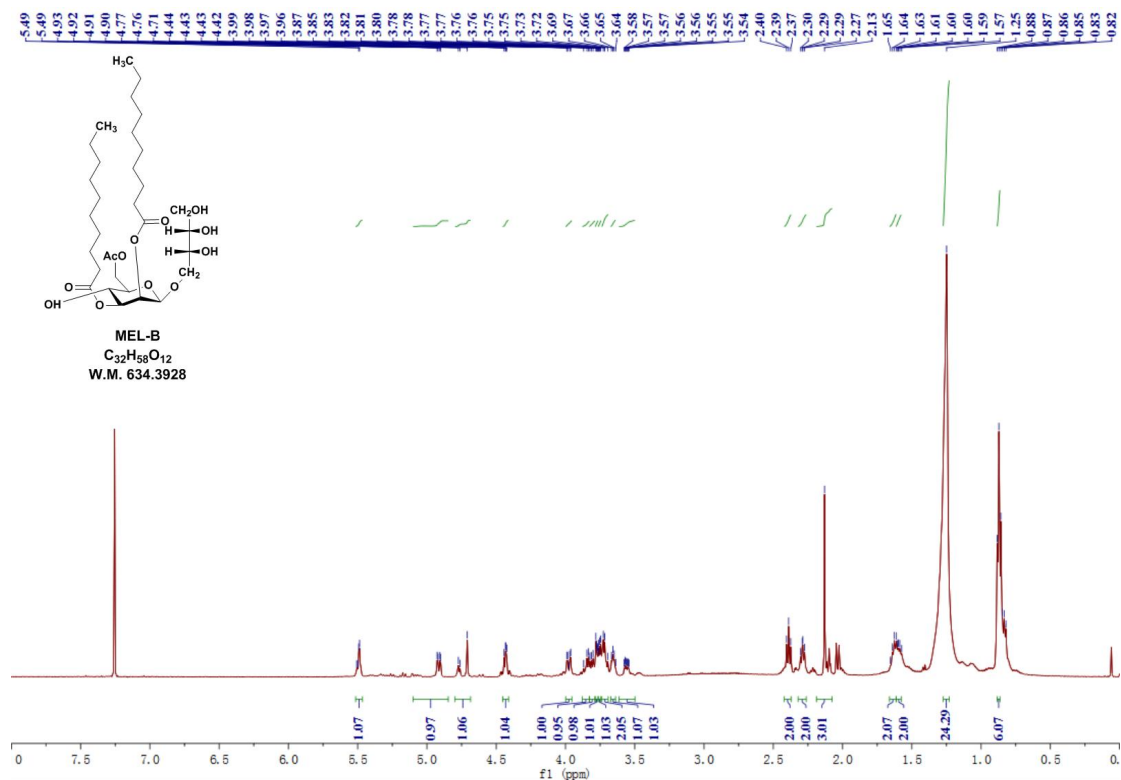

**Figure S6:**  $^{13}\text{C}$  and DEPT NMR spectrum of **MEL-B** in  $\text{CDCl}_3$  (126 MHz).

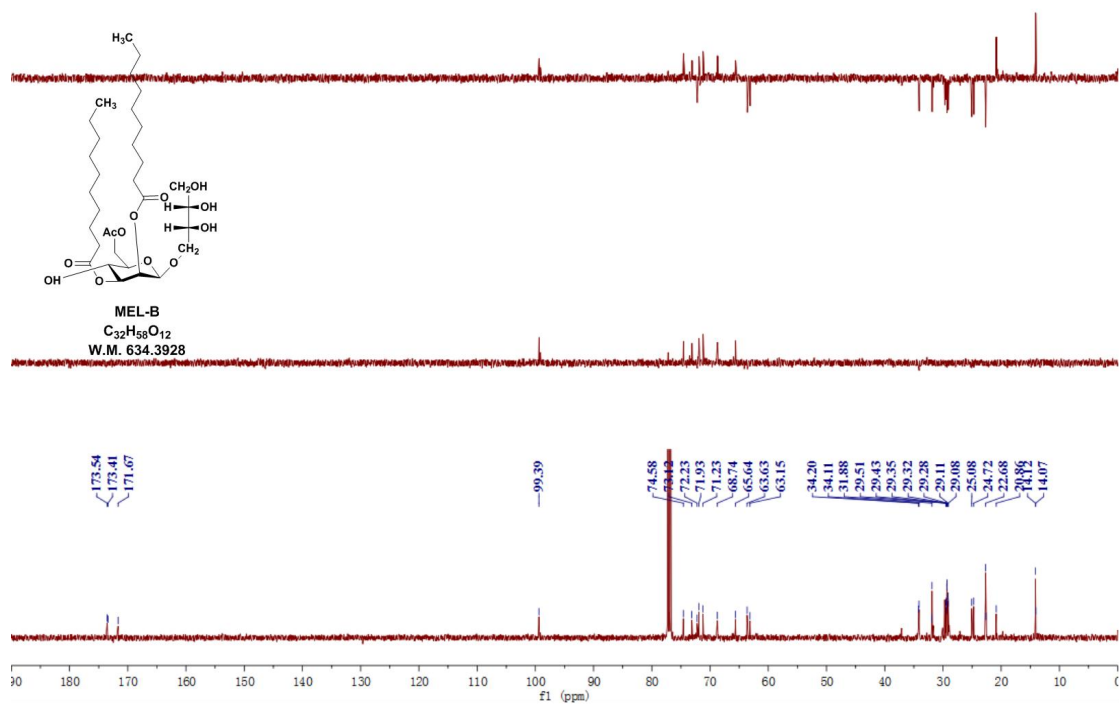

Figure S7: HRESIMS of MEL-C

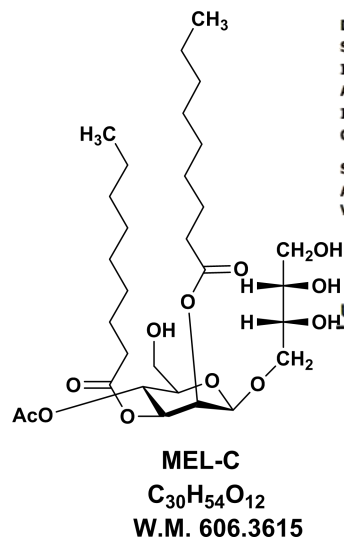

Qualitative Analysis Report

|                        |                             |               |                     |
|------------------------|-----------------------------|---------------|---------------------|
| Data Filename          | HMEL10-1.d                  | Sample Name   | HMEL10-1            |
| Sample Type            | Sample                      | Position      | P1-A1               |
| Instrument Name        | Instrument 1                | User Name     |                     |
| Acq Method             | s.m                         | Acquired Time | 9/9/2020 2:36:49 PM |
| IRM Calibration Status | Success                     | DA Method     | Default.m           |
| Comment                |                             |               |                     |
| Sample Group           | Info.                       |               |                     |
| Acquisition SW         | 6200 series TOF/6500 series |               |                     |
| Version                | Q-TOF B.05.01 (B5125.2)     |               |                     |

User Spectra

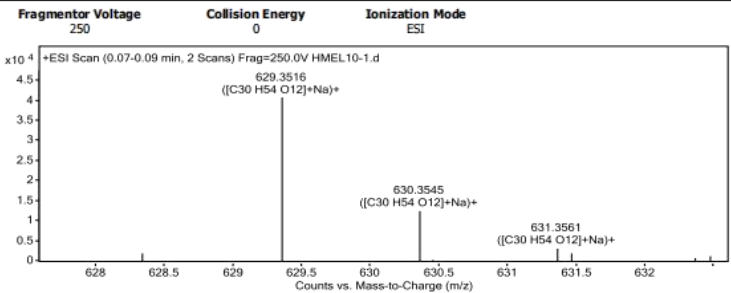

Peak List

| m/z      | z | Abund     |
|----------|---|-----------|
| 545.2579 | 1 | 73056.17  |
| 657.383  | 1 | 107804.38 |
| 671.3625 | 1 | 241115.44 |
| 672.3656 | 1 | 81602.03  |
| 697.378  | 1 | 88028.43  |
| 699.3933 | 1 | 537962.63 |
| 700.3971 | 1 | 196029.84 |
| 701.3994 | 1 | 44330.29  |
| 715.3669 | 1 | 45312.07  |
| 809.5022 | 1 | 44510.05  |

Formula Calculator Element Limits

| Element | Min | Max |
|---------|-----|-----|
| C       | 3   | 60  |
| H       | 0   | 120 |
| O       | 0   | 30  |

Formula Calculator Results

| Formula                                         | CalculatedMass | CalculatedMz | Mz       | Diff. (mDa) | Diff. (ppm) | DBE    |
|-------------------------------------------------|----------------|--------------|----------|-------------|-------------|--------|
| C <sub>30</sub> H <sub>54</sub> O <sub>12</sub> | 606.3615       | 629.3507     | 629.3516 | -0.90       | -1.43       | 4.0000 |

--- End Of Report ---

**Figure S8:**  $^1\text{H}$  NMR spectrum of **MEL-C** in  $\text{CDCl}_3$  (600 MHz).

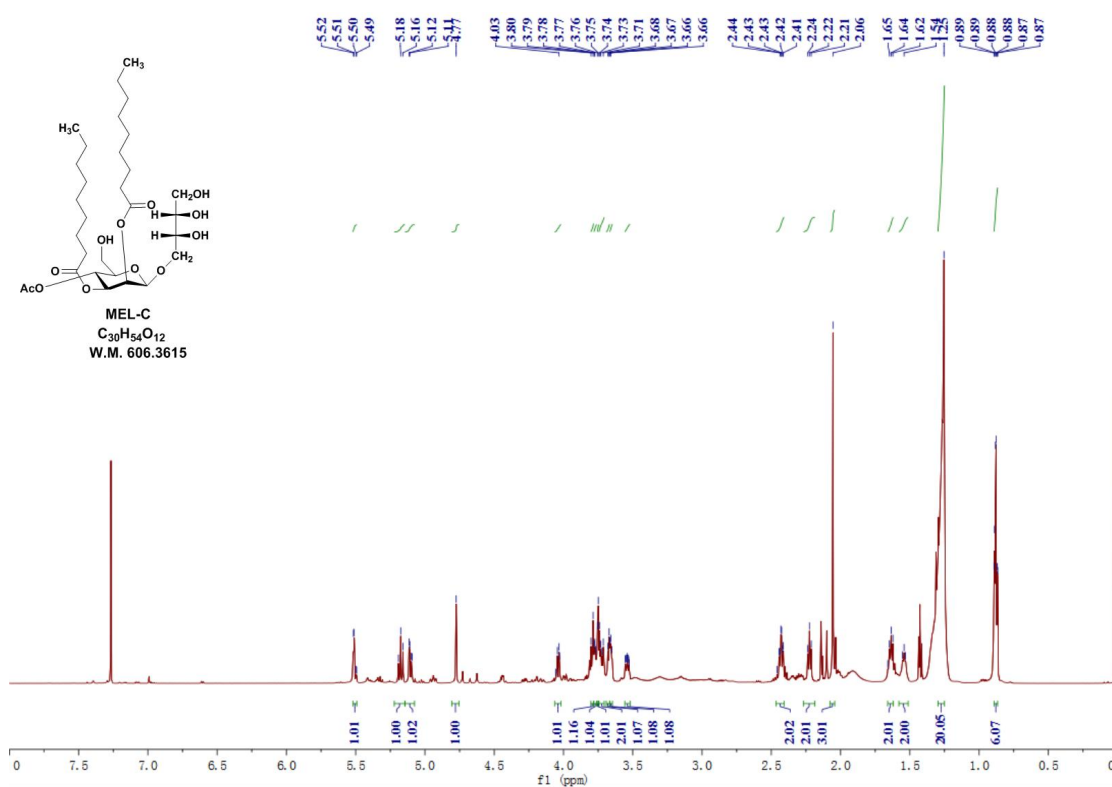

**Figure S9:**  $^{13}\text{C}$  and DEPT NMR spectrum of **MEL-C** in  $\text{CDCl}_3$  (151 MHz).

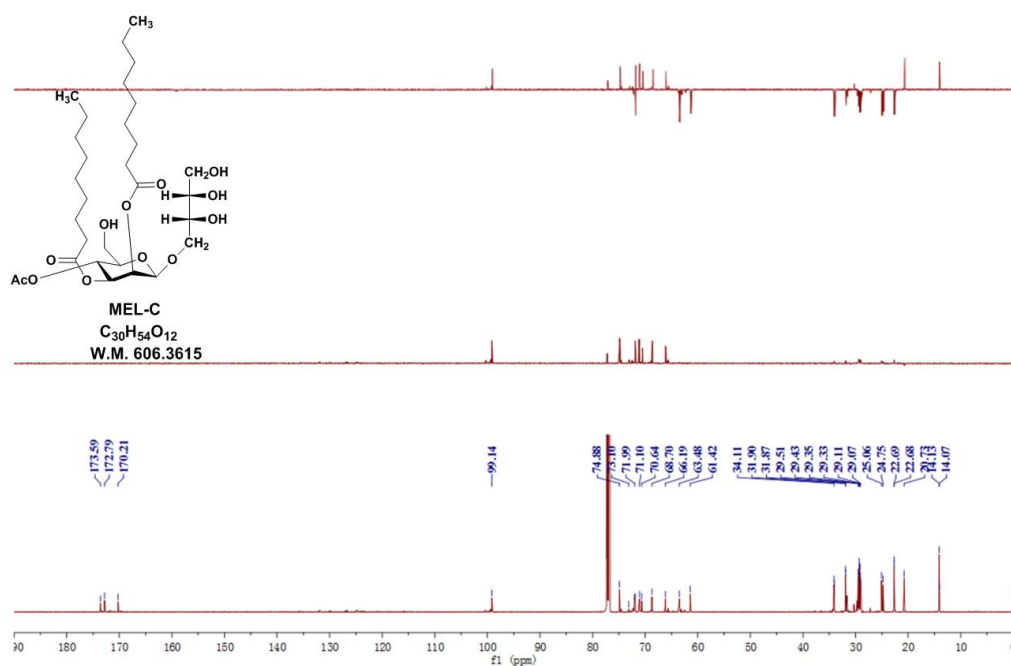

Supplement: s1 [file s1]
